# Supplementary material
Source: PubMed Central journal article supplement (PMC2718409)
Supplement: supp_172_8_1026__1.pdf [file supp_172_8_1026__1.pdf]

ONLINE DATA SUPPLEMENT

*ABCA3* Mutations Associated with Pediatric Interstitial Lung Disease

Janine E. Bullard, Susan E. Wert, Jeffrey A. Whitsett, Michael Dean, and Lawrence M. Noguee

Detailed information about enrollment into the ongoing study designed to detect defects in surfactant metabolism, including ABCA3, is available through contact with Dr. Lawrence Nogee. Email: [lnogee@jhmi.edu](mailto:lnogee@jhmi.edu). Clinical testing for SP-B gene (*SFTPB*) and SP-C (*SFTPC*) mutations is available through the DNA Diagnostics lab at Johns Hopkins Hospital, <http://www.hopkinsmedicine.org/dnadiagnostic>.

**Table E1: ABCA3 Gene Primers**

| <b>ABCA3 Exon</b> | <b>Forward Primer Sequence (5'→ 3')</b> | <b>Reverse Primer Sequence (3'→ 5')</b> | <b>Genomic Position</b> | <b>Product Size (bp)</b> | <b>Anneal Temp (°C)</b> |
|-------------------|-----------------------------------------|-----------------------------------------|-------------------------|--------------------------|-------------------------|
| 4, 5              | CCCACTCTGCGTGTTCCTATTG                  | CAGCTGCTTCGCACATCCTG                    | 2988-3620               | 633                      | 60                      |
| 6                 | AAGCCCTAGAGGATTTGCC                     | TGAGGGAACAGAAAGGAGC                     | 4896-5397               | 502                      | 60                      |
| 7                 | TAGGACAGGGACCACTCAG                     | GACTGTCACTAGTCAACAGCC                   | 5676-6071               | 396                      | 60                      |
| 8                 | GGTCTGAGCTGAAGTCAC                      | CCAAGCCTTTGGACATGG                      | 9571- 10030             | 460                      | 60                      |
| 9,10              | GTCACGTCTCACAGCCATG                     | GTTATTTCCATGCAGATGG                     | 11361- 12323            | 963                      | 60                      |
| 9                 |                                         | GACTCTCTCTGAAGTCTCTG                    | 11978                   | 618                      | 60                      |
| 10                | TGTCCAACCTCTCTCGGTG                     |                                         | 12027                   | 296                      | 60                      |
| 11                | CGTGAGGTGTGCAGTGTC                      | GTGCTCTCGAAGGTTACTG                     | 20623-21140             | 517                      | 62                      |
| 12                | TTATGCTAAATGCACATTGACC                  | ACAGGGCAGGTTCTGTGTG                     | 25033-25695             | 663                      | 58                      |
| 13, 14            | TTGTTGCTTTGCTCGTCAC                     | GCGCTGAGATGGTGTAAAG                     | 29325- 30190            | 866                      | 60                      |
| 13                |                                         | GCC GTG CTG GTA AGT CTT C               | 29575                   | 251                      | 60                      |
| 14                | GAT GGT GAC GCT AGG CTT G               |                                         | 29882                   | 309                      | 60                      |
| 15, 16, 17        | GGTCCTCAGAGGAAATTAGG                    | TGAAGGTAGCAGCCATTCC                     | 30839-32222             | 1394                     | 60                      |
| 15                |                                         | TAGTCCTCGGAAGACTG                       | 31170                   | 362                      | 60                      |
| 16                | TGCATCTCCCCAGCTACG                      |                                         | 31447                   | 226                      | 58                      |
| 18                | AGAACCACACCATAACCATC                    | TGCCTCTGAGCACAAAGC                      | 33370-33971             | 602                      | 60                      |
| 19                | ACAGGTGTGAGGCACTGTG                     | AAGTCCTCTGCAGCACGG                      | 37135- 37395            | 261                      | 64                      |
| 20                | TCAGGAGTTCAGATCAGC                      | GCTTACATGAGGCGTTTGG                     | 39624- 40114            | 491                      | 60                      |
| 21                | TCAACGCTCTGGGAGTCTC                     | AACTCTGGCTGCAGGACTGG                    | 41007- 41513            | 507                      | 60                      |
| 22                | TGCCCAGGTGTCACCTCTTC                    | TGGGAGGGCAGACACAATGC                    | 42461-42891             | 431                      | 62                      |
| 23, 24            | TCATAACCGAGAACCCGAC                     | GGCTGGTGAGCATGAACTG                     | 43758-44826             | 1069                     | 60                      |
| 23                |                                         | GGT AAA GGC TGA GGG TGC A               | 44206                   | 449                      | 60                      |
| 24                | TCC GGG TGC AAG GGG ATG                 |                                         | 44269                   | 558                      | 60                      |
| 25, 26            | ACACAGCACGGATAAGGC                      | TACAGTGGGAGACCATCTGG                    | 44941-46425             | 1484                     | 60                      |
| 25                |                                         | CAGGCCACTCAGACGCAG                      | 45290                   | 350                      | 60                      |
| 26                | CTGTGACCTACTGG CTTC                     |                                         | 45973                   | 318                      | 60                      |
| 27, 28            | CTGAGATTGGGACGAGAAG                     | ATTACCTTGTCTCGCTGTC                     | 47838-48610             | 773                      | 60                      |
| 29, 30            | ACACACTGGCAGGAACCAC                     | ATGCTGATGGGTCTCCTGG                     | 50226- 51277            | 1052                     | 64                      |
| 29                |                                         | GACATCTCTCACTGCTGGCTT                   | 50738                   | 513                      | 64                      |
| 30                | CTCTTCACTAGGGCTGTTCTG                   |                                         | 50894                   | 384                      | 64                      |
| 31, 32            | TGTCTGCACAAGCCTTTG                      | AAGAGCCTGCAGTCACCAC                     | 51354-51974             | 621                      | 64                      |
| 33                | ATTGCCAGAGGACTCCCAGGTC                  | GGAGAGAGAGGATGTAAGATG                   | 52596- 52879            | 284                      | 58                      |
